# Supplementary material for: Comprehensive analysis of key genes and microRNAs in radioresistant nasopharyngeal carcinoma
Source: PubMed Central journal article supplement (PMC6537399; doi:10.1186/s12920-019-0507-6), 2019-05-28
Supplement: 12920_2019_507_MOESM1_ESM.pdf [file 12920_2019_507_MOESM1_ESM.pdf]

1. The mRNA expression profile of GSE48501 and microRNA profile of GSE48502 were downloaded from the GEO database (Gene expression omnibus, <http://www.ncbi.nlm.nih.gov/geo/>).
2. GEO2R analysis software can be download from (<http://www.ncbi.nlm.nih.gov/geo/geo2r/>).
3. Disease gene search engine with evidence sentence (DigSee) can be got from (<http://210.107.182.61/geneSearch/>).
4. Venn diagram (<http://bioinformatics.psb.ugent.be/webtools/Venn/>).
5. Gene ontology (GO) biological process terms and pathway enrichment analysis of differentially expressed genes was performed using FunRich software ([www.funrich.org/](http://www.funrich.org/)) and Clue Go software respectively. The P-value <0.05 was considered significant GO and pathway term. DIANA miRPATH tool (<http://diana.imis.athena-innovation.gr/DianaTools/>) .
6. The STRING database (<http://string-db.org/>) is an online tool to construct protein-protein interaction network, including physical and functional associations.
7. mirDIP online software (<http://ophid.utoronto.ca/mirDIP/index.jsp>).
8. Cytoscape software can be download from <https://cytoscape.org/>.
